# Supplementary material for: Plant_SNP_TATA_Z-Tester: A Web Service That Unequivocally Estimates the Impact of Proximal Promoter Mutations on Plant Gene Expression
Source: MDPI journal article supplement (doi:10.3390/ijms23158684), 2022-08-04

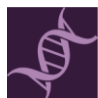

# Plant\_SNP\_TATA\_Z-tester: a Web Service that Unequivocally Estimates the Impact of Proximal Promoter Mutations on Plant Gene Expression

Dmitry Rasskazov<sup>1</sup>, Irina Chadaeva<sup>1</sup>, Ekaterina Sharypova<sup>1</sup>, Karina Zolotareva<sup>1</sup>, Bato Khandaev<sup>1</sup>, Petr Ponomarenko<sup>1</sup>, Nikolay Podkolodnyy<sup>1,2</sup>, Natalya Tverdokhleba<sup>1</sup>, Oleg Vishnevsky<sup>1</sup>, Anton Bogomolov<sup>1</sup>, Olga Podkolodnaya<sup>1</sup>, Ludmila Savinkova<sup>1</sup>, Elena Zemlyanskaya<sup>1</sup>, Vadimir Golubyatnikov<sup>3</sup>, Nikolay Kolchanov<sup>1</sup>, Mikhail Ponomarenko<sup>1,\*</sup>

<sup>1</sup> Institute of Cytology and Genetics, Novosibirsk 630090, Russia

<sup>2</sup> Institute of Computational Mathematics and Mathematical Geophysics, Novosibirsk 630090, Russia

<sup>3</sup> Sobolev Institute of Mathematics, Novosibirsk 630090, Russia

\* Correspondence: pon@bionet.nsc.ru. Tel.: +7 (383) 363-4963 ext. 1311 (M.P.)

**Human\_SNP\_TATA\_Z-tester as the prototype used in this work to empirically solve an ill-posed inverse problem about how to uniformly estimate effects of mutations in proximal promoters on gene expression in plant grown under various environmental conditions during development (Figure 2b)**

For our previously developed Web-service Human\_SNP\_TATA\_Z-tester [28] shown in Figure 2b (hereinafter, see the main text), the input is two 90 bp DNA sequences, which are  $S_{wt} = \{s^{wt}_{-90} \dots s^{wt}_i \dots s^{wt}_{+1}\}$  and  $S_m = \{s^{min}_{-90} \dots s^{min}_i \dots s^{min}_{+1}\}$  immediately before the transcription start site (TSS,  $s^{wt}_0 = s^{min}_0$ , where:  $s_i \in \{a, c, g, t\}$ ) of the human gene proximal promoter carrying either ancestral (wt) or minor (min) allele, respectively, of an arbitrary SNP under study. In this figure, readers can see them in two textboxes “1st promoter” and “2nd promoter”, respectively.

After clicking the “Calculate” button (Figure 2b), using our three-step model [29] of the TBP-promoter binding (i.e., TBP slides along DNA [18]  $\leftrightarrow$  molecular co-recognition between TBP and TBP-site met [30]  $\leftrightarrow$  DNA-bend stabilizes TBP-promoter complex [32]) as proven experimentally [33], our Web-service Human\_SNP\_TATA\_Z-tester [28] estimated two “ $-\ln[K_D(S_\bullet)]$ ”-values expressed on the natural-logarithm scale (ln-units), which evaluate the TBP-promoter affinity upon each DNA sequences ( $S_\bullet$ ) independently from one another, such as:

$$-\ln[K_D(S_\bullet)] = 10.9 - 0.2 \{\ln[K_{SLIDE}(S_\bullet)K_{STOP}(S_\bullet)K_{BEND}(S_\bullet)]\}, \quad (S1)$$

where  $K_D$  is the equilibrium dissociation constant estimation (in moles per liter, M); 10.9 (ln-units) seems to numerically match nonspecific TBP–DNA affinity (10  $\mu$ M) as measured independently [62]; 0.2 is a stoichiometric coefficient of the three-step TBP–promoter binding, as determined elsewhere by means of the difference in the length of the TBP consensus site and the region of TBP sliding along DNA [29].

First of all, within Eq. S1,  $-\ln[K_{STOP}(S_\bullet)]$  is an estimation of the equilibrium dissociation constant of the mutual recognition between TBP and the most probable TBP-site encountered at the second step among the three steps in question:

$$-\ln[K_{STOP}(S_\bullet)] = \text{MAX}_{-90 \leq i \leq -20; k \in \{-1, +1\}} \{\sum_{i-1 \leq j \leq i+13} w\{i, s_{jk}^\bullet\}\}, \quad (S2)$$

where  $w\{i, s_{jk}^\bullet\}$  is Bucher’s weight of nucleotide  $s_{jk}^\bullet$  at the  $j$ th position of the TBP-site [31];  $k$  is an indicator of either a direct (+1) or complementary (−1) strand of the double-stranded B-helical DNA of the promoter under study.;  $\text{MAX}(\zeta)$  is the highest  $\zeta$ -value observed.

Besides, in Eq. S1,  $-\ln[K_{\text{SLIDE}}(S_{\bullet})]$  is an estimate of the equilibrium dissociation constant of an interaction between TBP and the promoter DNA during their sliding one over the other at the first step among the three within this bioinformatics model, as:

$$-\ln[K_{\text{SLIDE}}(S_{\bullet})] = \text{MEAN}_{[\xi-7;\xi+19]; k \in \{-1; +1\}} (35.1\mu + 0.8[\text{TA}]), \tag{S3}$$

where  $\xi$  is the position of the most probable TBP-site according to Bucher’s criterion [31] (i.e., Eq. S2); the  $\mu$  value of the minor-groove width of the B-helical DNA at this site’s center was determined elsewhere [63]; [TA] is the concentration of dinucleotide TA; 0.8 and 35.1 are linear regression coefficients [64].

Finally, in Eq. S1,  $-\ln[K_{\text{BEND}}(S_{\bullet})]$  is an estimation of the equilibrium dissociation constant of intermediate short-lived complexes between TBP and each of two DNA strands of the TBP-site separately from one another during DNA melting leading to the bend that fixes the TBP–promoter complex [32] at the last step of their binding, as follows:

$$-\ln[K_{\text{BEND}}(S_{\bullet})] = \text{MEAN}_{[\xi-7;\xi+19]; k \in \{-1; +1\}} (0.9[\text{TA}, \text{AA}, \text{TG}, \text{AG}] + 2.5[\text{TA}, \text{TC}, \text{TG}] + 14.4), \tag{S4}$$

where 0.9, 2.5, and 14.4 are linear regression coefficients [64].

After that, examining all the possible mutations,  $s^* \rightarrow \varphi$ , at each  $j$ th position among 26 positions of the most probable TBP-site according to Eq. S2, our Web-service Human\_SNP\_TATA\_Z-tester [28] estimated standard error of the mean  $\text{SEM}_{\bullet}$  of the  $-\ln[K_D(S_{\bullet})]$  values calculated using Eq. S1, as:

$$\text{SEM}_{\bullet} = \{(\sum_{\xi-7 \leq j \leq \xi+19} \sum_{\varphi \in \{a,c,g,t\}} \ln[K_D(s^*_{\xi-7} \dots s_{j-1} \varphi s_{j+1} \dots s^*_{\xi+19})] / K_D(s^*_{\xi-7} \dots s_{j-1} s_j s_{j+1} \dots s^*_{\xi+19})\}^2 / ((3*26)(3*26 - 1))\}^{1/2}. \tag{S5}$$

Using both sequences  $S_{\text{wt}}$  and  $S_{\text{min}}$  and Eqs. S1 – S5, this toolbox found two paired value sets  $\{-\ln[K_D(S_{\text{wt}})] \pm \text{SEM}_{\text{wt}}\}$  and  $\{-\ln[K_D(S_{\text{min}})] \pm \text{SEM}_{\text{min}}\}$ , respectively, which are necessary for Fisher’s Z-score [65], for instance:

$$Z = \text{abs}\{\ln[K_D(S_{\text{wt}}) / K_D(S_{\text{min}})] / [\text{SEM}_{\text{wt}}^2 + \text{SEM}_{\text{min}}^2]^{1/2}\}. \tag{S6}$$

Eventually, with the help of the R software [65], using this Z-value, our Web-service Human\_SNP\_TATA\_Z-tester [28] found a  $p$  value of the probability of the tested hypothesis “ $H_0: K_D(S_{\text{wt}}) \neq K_D(S_{\text{min}})$ ” so that if it is statistical significant ( $p > 0.95$ ), it made the decision:

```
IF      {INEQUALITY “ $K_D(S_{\text{min}}) < K_D(S_{\text{wt}})$ ” is statistically significant },
THEN   {PREDICTION is “the minor allele of the gene considered is overexpressed relative to the ancestral one”};
ELSE   IF      {INEQUALITY “ $K_D(S_{\text{min}}) > K_D(S_{\text{wt}})$ ” is statistically significant},
THEN   {DECISION is “the minor allele of this gene is underexpressed relative to the ancestral one”},
OTHERWISE {DECISION is “the expression change of this gene is insignificant”}.
```

Our Web service Human\_SNP\_TATA\_Z-tester [28] presents this decision (Eq. S7) in the “Decision” line of the “Result” textbox, while all the intermediate results are in the other lines of this textbox, as readers can see in Figure 2b. Table S1 presents how we experimentally selectively confirmed this from article to article [28, 35-39, 41, 42, 66, 67]. Figure S1 does this in graphical form.

**Table S1.** An electrophoretic mobility shift assay (EMSA)-based in vitro verification of the complex of TBP with synthetic 26 bp oligodeoxyribonucleotides (ODNs) identical to natural human gene promoters near each SNP tested

| # | Human gene,<br>dbSNP ID [66] | WT<br>min | 26 bp oligodeoxyribonucleotides,<br>direct strand 5'-ODN-3' | Prediction, ln units |                   | Experiment, <i>in vitro</i> , ln units |                   | Reference |
|---|------------------------------|-----------|-------------------------------------------------------------|----------------------|-------------------|----------------------------------------|-------------------|-----------|
|   |                              |           |                                                             | $-\ln(K_D)$          | $\Delta \ln(K_D)$ | $-\ln(K_D)$                            | $\Delta \ln(K_D)$ |           |
| 1 | LEP                          | WT        | gatcggggccGCTATAAGAgggggcggg                                | 19.43                |                   | 16.37                                  |                   |           |
| 2 | rs34104384                   | A-30T     | gatcggggccGCTATAAGTgggggcggg                                | 19.70                | 0.27              | 16.43                                  | 0.06              | [35]      |
| 3 | rs201381696                  | A-35G     | gatcggggccGCTGTAAGAgggggcggg                                | 18.22                | -1.21             | 15.28                                  | -1.09             |           |
| 4 | rs200487063                  | G-38A     | gatcggggccACTATAAGAgggggcggg                                | 19.85                | 0.42              | 16.96                                  | 0.59              |           |
| 5 | ABCA9                        | WT        | aattattttgTATATTTctgagcatac                                 | 19.66                |                   | 16.47                                  |                   | [39]      |
| 6 | rs367781716                  | T-37C     | aattattttgCATATTTctgagcatac                                 | 18.78                | -0.88             | 15.59                                  | -0.88             |           |
| 7 | F9                           | WT        | tttggTACAACTAATcgaccttacca                                  | 18.86                |                   | 15.05                                  |                   | [41]      |
| 8 | rs750827465                  | C-34A     | tttggTACAAATAATcgaccttacca                                  | 19.32                | 0.46              | 16.22                                  | 1.17              |           |

Table S1. Cont.

| #  | Human gene,<br>dbSNP ID [66] | WT<br>min | 26 bp oligodeoxyribonucleotides,<br>direct strand 5'-ODN-3' | Prediction, ln units |                      | Experiment, <i>in vitro</i> , ln units |                      | Reference |
|----|------------------------------|-----------|-------------------------------------------------------------|----------------------|----------------------|----------------------------------------|----------------------|-----------|
|    |                              |           |                                                             | -ln(K <sub>D</sub> ) | Δln(K <sub>D</sub> ) | -ln(K <sub>D</sub> )                   | Δln(K <sub>D</sub> ) |           |
| 9  | <i>HBD</i>                   | WT        | acaggaccagC <b>A</b> TAAAAggcagggca                         | 19.29                |                      | 17.14                                  |                      | [36]      |
| 10 | rs34166473                   | T-30C     | acaggaccagCA <b>T</b> AAAAggcagggca                         | 18.27                | -1.02                | 15.02                                  | -2.12                |           |
| 11 | rs35518301                   | A-31G     | acaggaccagC <b>G</b> TAAAAggcagggca                         | 18.65                | -0.64                | 16.12                                  | -1.02                |           |
| 12 | <i>MBL2</i>                  | WT        | catctatttctTA <b>T</b> ATAGcctgcaccc                        | 20.17                |                      | 17.20                                  |                      |           |
| 13 | rs72661131                   | T-39C     | catctatttctTA <b>C</b> ATAGcctgcaccc                        | 19.30                | -0.87                | 16.73                                  | -0.47                |           |
| 14 | <i>IL1B</i>                  | WT        | ttttgaaagc <b>C</b> ATAAAAAacagcgagg                        | 19.22                |                      | 17.73                                  |                      |           |
| 15 | rs1143627                    | C-31T     | ttttgaaagc <b>T</b> ATAAAAAacagcgagg                        | 20.16                | 0.94                 | 19.15                                  | 1.42                 |           |
| 16 | <i>TPI1</i>                  | WT        | cgcggcgctcTATA <b>T</b> AAgtgggcagt                         | 20.70                |                      | 19.31                                  |                      |           |
| 17 | rs1800202                    | T-26G     | cgcggcgctcTATA <b>G</b> AAgtgggcagt                         | 19.29                | -1.41                | 16.12                                  | -3.13                |           |
| 18 | <i>F3</i>                    | WT        | gccggcccTTTATAg <b>c</b> gcgcggggca                         | 19.60                |                      | 16.45                                  |                      |           |
| 19 | rs563763767                  | c-21T     | gccggcccTTTATAg <b>T</b> gcgcggggca                         | 20.02                | 0.42                 | 17.47                                  | 1.02                 |           |
| 20 | <i>HBB</i>                   | WT        | cagggctggg <b>C</b> A <b>T</b> AAAAgtcagggca                | 19.20                |                      | 16.81                                  |                      | [42]      |
| 21 | rs34598529                   | A-28G     | cagggctgggCATAg <b>G</b> AAgtcagggca                        | 18.34                | -0.86                | 14.40                                  | -2.41                |           |
| 22 | rs34598529                   | A-28C     | cagggctgggCATAg <b>C</b> AAgtcagggca                        | 18.63                | -0.57                | 14.51                                  | -2.30                |           |
| 23 | rs281864525                  | A-25C     | cagggctgggCATAAAA <b>C</b> gtcagggca                        | 18.73                | -0.47                | 15.71                                  | -1.10                |           |
| 24 | rs63750953                   | Δ-25AA    | ccagggctgggCATAg <b>A</b> gtcagggcag                        | 18.61                | -0.59                | 15.71                                  | -1.10                |           |
| 25 | rs33980857                   | T-29A     | cagggctgggCA <b>A</b> AAAAgtcagggca                         | 17.70                | -1.50                | 16.02                                  | -0.79                |           |
| 26 | rs33980857                   | T-29C     | cagggctgggCA <b>C</b> AAAAgtcagggca                         | 18.17                | -1.03                | 15.78                                  | -1.03                |           |
| 27 | rs33980857                   | T-29G     | cagggctgggCA <b>G</b> AAAAgtcagggca                         | 17.67                | -1.53                | 16.02                                  | -0.79                |           |
| 28 | rs33931746                   | A-27T     | cagggctgggCATAg <b>T</b> AAgtcagggca                        | 19.75                | 0.55                 | 16.63                                  | -0.18                |           |
| 29 | rs34598529                   | A-28G     | cagggctgggCAT <b>G</b> AAgtcagggca                          | 17.85                | -1.35                | 14.51                                  | -2.30                |           |
| 30 | rs34500389                   | C-32T     | cagggctggg <b>T</b> ATAAAAAgtcagggca                        | 20.18                | 0.98                 | 17.26                                  | 0.45                 |           |
| 31 | <i>HBZ</i>                   | WT        | agctccctgTA <b>T</b> ATAAggggaccctg                         | 20.76                |                      | 18.93                                  |                      |           |
| 32 | rs11318094                   | T-29A     | agctccctgTA <b>A</b> ATAAggggaccctg                         | 19.28                | -1.48                | 17.03                                  | -1.90                |           |
| 33 | <i>EPOR</i>                  | WT        | cacgtcatc <b>T</b> A <b>T</b> TTTGTctgctacg                 | 18.24                |                      | 15.05                                  |                      |           |
| 34 | rs1006576690                 | T-27A     | cacgtcatcTAT <b>A</b> TTTGTctgctacg                         | 19.39                | 1.15                 | 18.33                                  | 2.74                 | [37]      |
| 35 | rs971717705                  | A-29G     | cacgtcatcT <b>G</b> TTTTTGTctgctacg                         | 18.11                | -0.13                | 15.71                                  | 0.12                 |           |
| 36 | rs567946217                  | c-31A     | cacgtcat <b>A</b> TATTTTGTctgctacg                          | 19.33                | 1.09                 | 17.68                                  | 2.09                 |           |
| 37 | rs567946217                  | c-31G     | cacgtcat <b>G</b> TATTTTGTctgctacg                          | 18.51                | 0.27                 | 16.34                                  | 0.75                 |           |
| 38 | <i>GCG</i>                   | WT        | gctggagagT <b>A</b> TATAAAAgcagtgcg                         | 20.89                |                      | 18.64                                  |                      | [38]      |
| 39 | rs183433761                  | A-41G     | gctggagagT <b>G</b> TATAAAAgcagtgcg                         | 20.28                | -0.61                | 17.83                                  | -0.81                |           |

Table S1. Cont.

| #  | Human gene,<br>dbSNP ID [66] | WT<br>min | 26 bp oligodeoxyribonucleotides,<br>direct strand 5'-ODN-3' | Prediction, ln units |                      | Experiment, <i>in vitro</i> , ln units |                      | Reference |
|----|------------------------------|-----------|-------------------------------------------------------------|----------------------|----------------------|----------------------------------------|----------------------|-----------|
|    |                              |           |                                                             | -ln(K <sub>D</sub> ) | Δln(K <sub>D</sub> ) | -ln(K <sub>D</sub> )                   | Δln(K <sub>D</sub> ) |           |
| 40 | ASMT                         | WT        | ggtgaccttttgtGcccagaataggt                                  | 18.18                |                      | 14.33                                  |                      |           |
| 41 | rs1402972626                 | G-30A     | ggtgaccttttgtAcccagaataggt                                  | 18.93                | 0.75                 | 13.82                                  | -0.51                |           |
| 42 | CDY2A                        | WT        | agaatgttccataTaatcgtcatagc                                  | 19.27                |                      | 15.65                                  |                      |           |
| 43 | rs20067072                   | T-24C     | agaatgttccataCaatcgtcatagc                                  | 18.76                | -0.51                | 14.51                                  | -1.14                |           |
| 44 | GTPBP6                       | WT        | atcacgagcacgtGatgaggagcggc                                  | 17.30                |                      | 13.41                                  |                      | [28]      |
| 45 | rs1393008234                 | G-24T     | atcacgagcacgtTatgaggagcggc                                  | 18.68                | 1.38                 | 13.48                                  | 0.07                 |           |
| 46 | SHOX                         | WT        | gaggtcgccgcgtAataatagtgaga                                  | 20.31                |                      | 17.06                                  |                      |           |
| 47 | rs1452787381                 | A-45G     | gaggtcgccgcgtGataatagtgaga                                  | 19.21                | -1.10                | 15.16                                  | -1.90                |           |
| 48 | ZFY                          | WT        | ggcggagggggccCaactaccatccc                                  | 17.67                |                      | 13.82                                  |                      |           |
| 49 | rs1452787381                 | C-56T     | ggcggagggggccTaactaccatccc                                  | 18.18                | 0.51                 | 13.12                                  | -0.70                |           |
| 50 | GRIN1                        | WT        | tggagggggACAAAGACagggtggtg                                  | 17.59                |                      | 14.95                                  |                      |           |
| 51 | rs1402667001                 | g-34a     | tggaggaggACAAAGACagggtggtg                                  | 17.74                | 0.15                 | 15.42                                  | 0.47                 |           |
| 52 | ASCL3                        | WT        | tcgaaaaaTAAAAAATAAataaacat                                  | 19.04                |                      | 18.24                                  |                      | [67]      |
| 53 | rs1049743008                 | T-45C     | tcgaaaaaTAAAAACAAAataaacat                                  | 18.75                | -0.29                | 17.90                                  | -0.34                |           |
| 54 | NOS1                         | WT        | tgtttcctGATAGAAAAaaaaaatgg                                  | 18.56                |                      | 18.77                                  |                      |           |
| 55 | rs1195040887                 | G-27A     | tgtttcctGATAAAAAaaaaaatgg                                   | 18.96                | 0.34                 | 18.95                                  | 0.18                 |           |

**Note.** For each TBP-ODN complex,  $-\ln(K_D)$  and  $\Delta\ln(K_D) = \ln(K_{D;WT}/K_{D;min})$  are absolute and relative estimates (i.e., compared to those of the wild-type allele, WT), respectively, of the equilibrium dissociation constant expressed in natural-logarithm units (ln units). Human genes: *ABCA9*, ATP-binding cassette subfamily A member 9; *ASCL3*, Achaete-Scute family BHLH transcription factor 3; *ASMT*, acetylserotonin O-methyltransferase; *CDY2A*, chromodomain Y-linked 2A; *EPOR*, erythropoietin receptor; *F3* and *F9*, coagulation factors III and IX, respectively; *GCG*, glucagon; *GRIN1*, glutamate ionotropic receptor NMDA type subunit 1; *GTPBP6*, GTP-binding protein 6; *HBB*, *HBD*, and *HBZ*, hemoglobin subunits  $\beta$ ,  $\delta$ , and  $\zeta$ , respectively; *IL1B*, interleukin 1 $\beta$ ; *LEP*, leptin; *MBL2*, mannose-binding lectin 2; *NOS1*, nitric oxide synthase 1; *SHOX*, short stature homeobox; *TPI1*, triosephosphate isomerase 1; *ZFY*, zinc finger protein Y-linked.

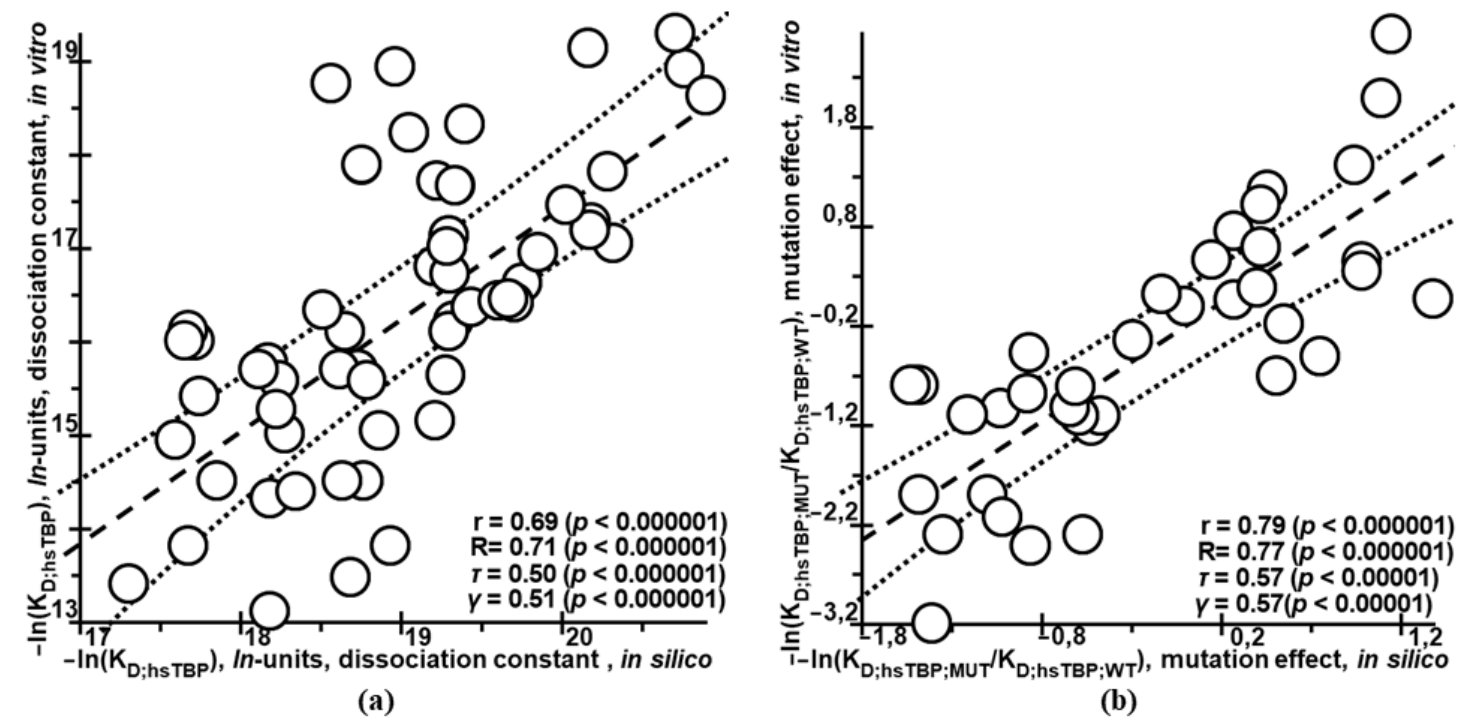

**Figure S1.** The significant correlations between the *in silico*-predicted (X-axis) and *in vitro*-measured (Y-axis)  $K_D$  values of the equilibrium dissociation constant of the TBP-ODN complex, as graphical representation of Table S1. Legend: (a) and (b): absolute and relative estimates (i.e., compared to those of the wild-type allele, WT), respectively, of equilibrium dissociation constant  $K_D$  expressed in natural-logarithm units (ln units). Dashed and dotted lines denote linear regression and boundaries of its 95% confidence interval, as calculated in the Statistica software (Statsoft™, Tulsa, OK, USA). Circles denote the ancestral (WT) and minor alleles (dbSNP ID [66]) of the SNP listed in Table S1;  $r$ ,  $R$ ,  $\tau$ ,  $\gamma$ , and  $p$  are linear correlation, Spearman's rank correlation, Kendall's rank correlation, Goodman-Kruskal generalized correlation, and their statistical significance levels, respectively.

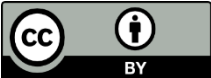

Supplement: s1 [file s1]
